# Supplementary material for: Uncertainty Evaluation for the Quantification of Urinary Amphetamine and 4-Hydroxyamphetamine Using Liquid Chromatography–Tandem Mass Spectrometry: Comparison of the Guide to the Expression of Uncertainty in Measurement Approach and the Monte Carlo Method with R
Source: MDPI journal article supplement (doi:10.3390/molecules28196803), 2023-09-25
Supplement: s1 [file s1]

## Derivation for uncertainty of calibrators

### [1] Preparation of the working standard solution

#### 1. W<sub>s</sub> solution (100 µg/mL)

Add 1 mL of reference standard of AP to a 10 mL volumetric flask with methanol.

$$u_r(W_{S,AP}) = \sqrt{\left(\frac{u(W_S)}{W_S}\right)^2} = \sqrt{\left(\frac{u(C_{R,AP})}{C_{R,AP}}\right)^2 + \left(\frac{u(V_{p1000})}{V_{p1000}}\right)^2 + \left(\frac{u(V_f)}{V_f}\right)^2} = 0.005306$$

Add 1 mL of reference standard of 4HA to a 10 mL volumetric flask with methanol.

$$u_r(W_{S,4HA}) = \sqrt{\left(\frac{u(W_S)}{W_S}\right)^2} = \sqrt{\left(\frac{u(C_{R,4HA})}{C_{R,4HA}}\right)^2 + \left(\frac{u(V_{p1000})}{V_{p1000}}\right)^2 + \left(\frac{u(V_f)}{V_f}\right)^2} = 0.005306$$

#### 2. W solution (10 µg/mL)

Add 1 mL of W<sub>s</sub> solutions of AP and 4HA to a 10 mL volumetric flask with methanol.

$$u_r(W_{AP}) = \sqrt{\left(\frac{u(W_{AP})}{W_{AP}}\right)^2} = \sqrt{\left(\frac{u(W_{S,AP})}{W_{S,AP}}\right)^2 + \left(\frac{u(V_{p1000})}{V_{p1000}}\right)^2 + \left(\frac{u(V_f)}{V_f}\right)^2} = 0.006878$$

$$u_r(W_{4HA}) = \sqrt{\left(\frac{u(W_{4HA})}{W_{4HA}}\right)^2} = \sqrt{\left(\frac{u(W_{S,4HA})}{W_{S,4HA}}\right)^2 + \left(\frac{u(V_{p1000})}{V_{p1000}}\right)^2 + \left(\frac{u(V_f)}{V_f}\right)^2} = 0.006878$$

### [2] Preparation of the calibration standard solutions

#### 1. C<sub>1</sub> solution (1000 ng/mL)

Mix 0.5 mL of W solution and 9 × 0.5 mL of blank urine.

$$u_r(C_1) = \sqrt{\left(\frac{u(C_1)}{C_1}\right)^2} = \sqrt{\left(\frac{u(W)}{W}\right)^2 + \left(\frac{9}{10}\right)^2 \times \left\{ \left(\frac{u(V_{p500})}{V_{p500}}\right)^2 + \frac{9u(V_{p500})^2}{(9V_{p500})^2} \right\}} = 0.007023$$

#### 2. C<sub>2</sub> solution (500 ng/mL)

Mix 1.0 mL of C<sub>1</sub> solution and 1.0 mL of blank urine.

$$u_r(C_2) = \sqrt{\left(\frac{u(C_2)}{C_2}\right)^2} = \sqrt{\left(\frac{u(C_1)}{C_1}\right)^2 + \frac{1}{2} \left(\frac{u(V_{p1000})}{V_{p1000}}\right)^2} = 0.007043$$

### 3. C<sub>3</sub> solution (200 ng/mL)

Mix  $2 \times 0.5$  mL of C<sub>2</sub> solution and  $3 \times 0.5$  mL of blank urine.

$$u_r(C_3) = \sqrt{\left(\frac{u(C_3)}{C_3}\right)^2} = \sqrt{\left(\frac{u(C_2)}{C_2}\right)^2 + \left(\frac{1.5}{2.5}\right)^2 \left\{ 2 \left(\frac{u(V_{p500})}{2V_{p500}}\right)^2 + \frac{3u(V_{p500})^2}{(3V_{p500})^2} \right\}} = 0.007091$$

### 4. C<sub>4</sub> solution (100 ng/mL)

Mix 1.0 mL of C<sub>3</sub> solution and 1.0 mL of blank urine.

$$u_r(C_4) = \sqrt{\left(\frac{u(C_4)}{C_4}\right)^2} = \sqrt{\left(\frac{u(C_3)}{C_3}\right)^2 + \frac{1}{2} \left(\frac{u(V_{p1000})}{V_{p1000}}\right)^2} = 0.007111$$

### 5. C<sub>5</sub> solution (50 ng/mL)

Mix 1.0 mL of C<sub>4</sub> solution and 1.0 mL of blank urine.

$$u_r(C_5) = \sqrt{\left(\frac{u(C_5)}{C_5}\right)^2} = \sqrt{\left(\frac{u(C_4)}{C_4}\right)^2 + \frac{1}{2} \left(\frac{u(V_{p1000})}{V_{p1000}}\right)^2} = 0.007131$$

### 6. C<sub>6</sub> solution (20 ng/mL)

Mix  $2 \times 0.5$  mL of C<sub>5</sub> solution and  $3 \times 0.5$  mL of blank urine.

$$u_r(C_6) = \sqrt{\left(\frac{u(C_6)}{C_6}\right)^2} = \sqrt{\left(\frac{u(C_5)}{C_5}\right)^2 + \left(\frac{1.5}{2.5}\right)^2 \left\{ 2 \left(\frac{u(V_{p500})}{2V_{p500}}\right)^2 + \frac{3u(V_{p500})^2}{(3V_{p500})^2} \right\}} = 0.007178$$

### 7. C<sub>7</sub> solution (10 ng/mL)

Mix 1.0 mL of C<sub>6</sub> solution and 1.0 mL of blank urine.

$$u_r(C_7) = \sqrt{\left(\frac{u(C_7)}{C_7}\right)^2} = \sqrt{\left(\frac{u(C_6)}{C_6}\right)^2 + \frac{1}{2} \left(\frac{u(V_{p1000})}{V_{p1000}}\right)^2} = 0.007197$$

### 8. C<sub>8</sub> solution (4 ng/mL)

Mix  $2 \times 0.5$  mL of C<sub>7</sub> solution and  $3 \times 0.5$  mL of blank urine.

$$u_r(C_8) = \sqrt{\left(\frac{u(C_8)}{C_8}\right)^2} = \sqrt{\left(\frac{u(C_7)}{C_7}\right)^2 + \left(\frac{1.5}{2.5}\right)^2 \left\{ 2 \left(\frac{u(V_{p500})}{2V_{p500}}\right)^2 + \frac{3u(V_{p500})^2}{(3V_{p500})^2} \right\}} = 0.007244$$

### [3] Dilution

Each calibration standard solution (100 µL) was mixed with mobile phase A (50 µL) and IS (50 µL) in a 1.5-mL polypropylene tube following the Preparation of Urine Sample step.

$$u_r(C_{CS.AP}) = \sqrt{\sum_{i=1}^7 u_r(C_{i.AP})^2 + 7 \left(\frac{1}{2}\right)^2 \left\{ \left(\frac{u(V_{p100})}{V_{p100}}\right)^2 + \frac{2u(V_{p50})^2}{(2V_{p50})^2} \right\}} = 0.018953$$

$$u_r(C_{CS.4HA}) = \sqrt{\sum_{i=2}^8 u_r(C_{i.4HA})^2 + 7 \left(\frac{1}{2}\right)^2 \left\{ \left(\frac{u(V_{p100})}{V_{p100}}\right)^2 + \frac{2u(V_{p50})^2}{(2V_{p50})^2} \right\}} = 0.019036$$
